# Supplementary material for: Pediatric Septic Shock Collaborative Improves Emergency Department Sepsis Care in Children
Source: Oxford University Press journal article supplement (doi:10.1542/peds.2020-007369), 2022-02-16
Supplement: peds_2020007369supplementarydata.pdf [file peds_2020007369supplementarydata.pdf]

## SUPPLEMENTAL INFORMATION

### COLLABORATIVE INVESTIGATORS

Jeffrey P. Louie, MD, University of Minnesota Masonic Children's Hospital, Minneapolis, Minnesota; Kelly Levasseur, DO, Beaumont Children's Hospital, Royal Oak, Michigan; Matthew P. Gray, MD, MS, Department of Pediatrics, Division of Pediatric Emergency Medicine, Children's Wisconsin, Milwaukee, Wisconsin; Christopher M. Pruitt, MD, Department of Pediatrics, Division of Pediatric Emergency Medicine, Medical University of South Carolina, Charleston, South Carolina; Emily Dawson, MD, Advocate Children's Hospital, Oak Lawn, Illinois; John Babineau, MD, Columbia University Department of Emergency Medicine, New York

Presbyterian Hospital, New York, New York; Cheryl Vance, MD, UC Davis School of Medicine, Sacramento, California; Johanna R. Rosen, MD, UPMC Children's Hospital of Pittsburgh, Pittsburgh, Pennsylvania; Leslie A. Hueschen, MD, Children's Mercy Hospital, University of Missouri-Kansas City, Kansas City, Missouri; Jason M. Woods, MD, Division of Emergency Medicine, Children's National Hospital, Washington, District of Columbia; Ann Kane, MD, Johns Hopkins University School of Medicine, Baltimore, Maryland; Elizabeth Allen, MD, Rainbow Babies and Children's Hospital, Cleveland, Ohio; Jonathan A. Silverman, MD, MPH, Virginia Commonwealth University School of Medicine, Richmond, Virginia; Gitte Y. Larsen, MD, MPH, Division of Pediatric Critical Care, Primary Children's Hospital and Department

of Pediatrics, University of Utah, Salt Lake City, Utah; Margaret Wolff, MD, MHPE, Department of Emergency Medicine and Pediatrics, University of Michigan Medical School, Ann Arbor, Michigan; Kathleen Brown, MD, Division of Emergency Medicine, Children's National Hospital, Washington, District of Columbia; Paul C. Mullan, MD, MPH, Division of Emergency Medicine, Children's Hospital of the King's Daughters, Department of Pediatrics, Eastern Virginia Medical School, Norfolk, Virginia; Krystle A. Bartley, MA, Texas Children's Hospital, Houston, Texas; Jennifer L. Jones, MS, Department of Pediatrics, Section of Emergency Medicine, Baylor College of Medicine, Houston, Texas; and Uma Ramamurthy, PhD, MBA, Research Resources Office, Department of Pediatrics, Baylor College of Medicine, Houston, Texas.

**SUPPLEMENTAL TABLE 4** PSSC Data Dictionary

| Variable                   | Definition                                                                                                                                                                                                                                                          |
|----------------------------|---------------------------------------------------------------------------------------------------------------------------------------------------------------------------------------------------------------------------------------------------------------------|
| <b>Mandatory variables</b> |                                                                                                                                                                                                                                                                     |
| PriorVisit24Hours          | Was there an ED visit at the same institution within the previous 24 h? Yes or no.                                                                                                                                                                                  |
| DateOfBirth                | Date of birth                                                                                                                                                                                                                                                       |
| EnrollmentDate             | Date stamp of index ED visit.                                                                                                                                                                                                                                       |
| Dispo                      | Where was the patient dispositioned after the ED visit? General floor, bone marrow transplant floor, step down-transitional or intermediate care unit, ICU, home, operating room, or morgue.                                                                        |
| AdmitDischargeTime         | Timestamp when the patient physically left the ED.                                                                                                                                                                                                                  |
| Deceased                   | Did the patient die? (Yes if within the same hospital admission and within 30 d.)                                                                                                                                                                                   |
| DateOfDeath                | Date and timestamp of death.                                                                                                                                                                                                                                        |
| RapidTransferICU           | Was the patient transferred from a general floor to the ICU within 12 h of leaving the ED? Yes or no.                                                                                                                                                               |
| RapidTransferICUTime       | Timestamp of transfer to ICU.                                                                                                                                                                                                                                       |
| FinalDischargeDate         | Timestamp of hospital discharge (or ED discharge if patient is not admitted).                                                                                                                                                                                       |
| Bolus1Given                | Was a first bolus given in the ED? Yes or no.                                                                                                                                                                                                                       |
| Bolus1Time                 | Timestamp of first bolus initiation.                                                                                                                                                                                                                                |
| Bolus3Given                | Was a third bolus given in the ED? Yes or no.                                                                                                                                                                                                                       |
| Bolus3Time                 | Timestamp of third bolus initiation.                                                                                                                                                                                                                                |
| AntibioticGiven            | Were antibiotics given in the ED? Yes or no.                                                                                                                                                                                                                        |
| FirstAntibioticTime        | Timestamp of first antibiotic initiation.                                                                                                                                                                                                                           |
| TriageAcuity               | Use local numeric triage scale.                                                                                                                                                                                                                                     |
| Wt                         | Weight in kilograms.                                                                                                                                                                                                                                                |
| ArrivalTime                | Timestamp of ED arrival.                                                                                                                                                                                                                                            |
| TriageTime                 | Timestamp of triage initiation.                                                                                                                                                                                                                                     |
| TriageHeartRateTime        | Timestamp of first documented heart rate.                                                                                                                                                                                                                           |
| TimeTargetVitalsDocumented | Timestamp when all initial vital signs (temperature, heart rate, respiratory rate, blood pressure, pulse oximeter) were documented. Use timestamp of the latest completed initial vital sign. "Never completely documented" option available.                       |
| <b>Optional variables</b>  |                                                                                                                                                                                                                                                                     |
| Source                     | Data source from which patient was identified (eg, by laboratory criteria, screening, etc [may be multiple]).                                                                                                                                                       |
| LastName                   | Last name                                                                                                                                                                                                                                                           |
| FirstName                  | First name                                                                                                                                                                                                                                                          |
| PaySource                  | Payer: Public, private, or other.                                                                                                                                                                                                                                   |
| Sex                        | Male or female.                                                                                                                                                                                                                                                     |
| ChiefComplaint             | Free text (first chief complaint listed in chart).                                                                                                                                                                                                                  |
| PatientReferred            | Was patient referred from either an outside facility or physician office? Yes or no.                                                                                                                                                                                |
| PatientReferredIfYes       | If the patient was referred, were they from an outside facility or referred by a physician?                                                                                                                                                                         |
| Location                   | Location of death if during hospitalization: ED, ICU, or floor.                                                                                                                                                                                                     |
| HoursBetweenFloorAndICU    | Autocalculated (hours on the floor before transfer to ICU [for rapid transfers only]).                                                                                                                                                                              |
| EDDiagnoses                | ICD diagnosis at time of ED disposition if available; if all admitting diagnoses grouped together, use physician assigned diagnosis, clinical impression or whatever is most representative of the ED working diagnoses per institutional practice. May be multiple |
| FinalDiagnoses             | ICD diagnosis at the end of hospitalization; if all admitting diagnoses grouped together, use whatever is most representative of final diagnosis institutional practice. May be multiple.                                                                           |
| PRISMDone                  | Was a Pediatric Risk of Mortality score calculated? Yes or no.                                                                                                                                                                                                      |
| PRISMScore                 | 12 h Pediatric Risk of Mortality 3 score.                                                                                                                                                                                                                           |
| PIMDone                    | Was a Pediatric Index of Mortality score calculated? Yes or no.                                                                                                                                                                                                     |
| PIMScore                   | Numeric Pediatric Index of Mortality 2 or 3 score.                                                                                                                                                                                                                  |
| AlertTriggered             | Was a sepsis alert triggered (per institutional definition)? Yes or no.                                                                                                                                                                                             |
| AntibioticsGiven           | Were antibiotics given in the ED? Yes or no.                                                                                                                                                                                                                        |
| FourtyFluidGiven           | Did the patient receive at least 40 mL/kg fluid in the ED? Yes or no.                                                                                                                                                                                               |
| BloodCultureSent           | Did the patient have a blood culture in the ED? Yes or no.                                                                                                                                                                                                          |
| VasoactiveAgentStarted     | Did the patient receive vasoactive agents in the ED? Yes or no.                                                                                                                                                                                                     |
| FinalDischargeDate         | Timestamp of hospital discharge (or ED discharge if patient not admitted).                                                                                                                                                                                          |
| HospLOS                    | LOS from ED arrival to hospital discharge.                                                                                                                                                                                                                          |
| PICULOS                    | Length of ICU stay from ED arrival to transfer out of the ICU                                                                                                                                                                                                       |
| VentHours                  | Include noninvasive ventilation, new intubations and increases in chronic ventilation settings within 24 h of admission. Counted from time of intubation and increase until extubation or until return to baseline.                                                 |
| PressorHours               | Included continuous intravenous medications intended to support blood pressure or perfusion (eg, dopamine, epinephrine, norepinephrine, dobutamine, milrinone, and vasopressin) initiated within 24 h of admission.                                                 |

**SUPPLEMENTAL TABLE 4** Continued

| Variable                         | Definition                                                                                                                                                 |
|----------------------------------|------------------------------------------------------------------------------------------------------------------------------------------------------------|
| WBC                              | First white blood cell count value measured in the ED.                                                                                                     |
| Hgb                              | First hemoglobin value measured in the ED.                                                                                                                 |
| Plt                              | First platelet value measured in the ED.                                                                                                                   |
| ANC                              | First absolute neutrophil count value measured in the ED.                                                                                                  |
| FirstBUN                         | First blood urea nitrogen value measured in the ED.                                                                                                        |
| FirstCr                          | First creatinine value measured in the ED.                                                                                                                 |
| DDimer                           | First D-dimer value measured in the ED.                                                                                                                    |
| CRP                              | First c-reactive protein value measured in the ED.                                                                                                         |
| VBGpH                            | First venous blood gas pH value measured in the ED.                                                                                                        |
| LacticAcid                       | First value measured in the ED.                                                                                                                            |
| HCO3                             | First bicarbonate value measured in the ED.                                                                                                                |
| K                                | First potassium value measured in the ED.                                                                                                                  |
| Glucose                          | First value measured in the ED.                                                                                                                            |
| Na                               | First sodium value measured in the ED.                                                                                                                     |
| LactateDateTime                  | Timestamp of lactate measurement in the ED.                                                                                                                |
| BloodCultureCollected            | Was a blood culture collected before or after antibiotics? Before or after.                                                                                |
| BloodCulture1                    | Was a blood culture collected? Yes or no.                                                                                                                  |
| BloodCultureResult1              | What was the first blood culture result? Positive or negative.                                                                                             |
| BloodCultureSource1              | What was the source of the blood culture? Central or peripheral.                                                                                           |
| BloodCulture2                    | Was a second blood culture collected?                                                                                                                      |
| BloodCultureResult2              | What was the second blood culture result? Positive or negative.                                                                                            |
| BloodCultureSource2              | What was the source of the second blood culture? Central or peripheral.                                                                                    |
| BloodCulture3                    | Was a third blood culture collected? Yes or no.                                                                                                            |
| BloodCultureResult3              | What was the third blood culture result? Positive or negative.                                                                                             |
| BloodCultureSource3              | What was the source of the third blood culture? Central or peripheral.                                                                                     |
| BloodPositiveOrganism            | Free text (organism on blood culture, including species and colony-forming units).                                                                         |
| UrineCulture                     | Was a urine culture collected? Yes or no.                                                                                                                  |
| UrineCultureResult               | What was the urine culture result? Positive or negative.                                                                                                   |
| UrinePositiveOrganism            | Free text (organism on urine culture, including species and colony-forming units).                                                                         |
| ViralCulture                     | Was a viral culture collected? Yes or no.                                                                                                                  |
| ViralTestingTechnique            | What viral testing technique was used? Rapid, polymerase chain reaction, culture, or other.                                                                |
| ViralTestingTechniqueOther       | Free text (if viral testing technique is "other," what technique?)                                                                                         |
| ViralCultureResult               | What was the viral culture result? Positive or negative.                                                                                                   |
| ViralPositiveOrganism            | Free text (organism on blood culture, including species and colony-forming units).                                                                         |
| TrachealAspirate                 | Was a tracheal aspirate collected? Yes or no.                                                                                                              |
| TrachealAspirateResult           | What was the tracheal aspirate result? Positive or negative.                                                                                               |
| TrachealAspiratePositiveOrganism | Free text (organism on tracheal aspirate, including species and colony-forming units).                                                                     |
| CerebrospinalFluidCulture        | Was a cerebrospinal fluid culture collected? Yes or no.                                                                                                    |
| CerebrospinalFluidCultureResult  | What was the cerebrospinal fluid culture result? Positive or negative.                                                                                     |
| CSFPositiveOrganism              | Free text (organism on cerebrospinal fluid culture, including species and colony-forming units).                                                           |
| WoundCulture                     | Was a wound culture collected? Yes or no.                                                                                                                  |
| WoundCultureResult               | What was the wound culture result? Positive or negative.                                                                                                   |
| WoundPositiveOrganism            | Free text - organism on wound culture, including species and colony-forming units.                                                                         |
| CXR                              | Was a chest radiograph done? Yes or no.                                                                                                                    |
| CXRFinding                       | What was the radiograph result? "Normal" or "viral-reactive airways" or "atelectasis" or "favor atelectasis" or "pneumonia" or "favor pneumonia" or other. |
| OtherCulture                     | Was any other culture collected? Yes or no.                                                                                                                |
| OtherCultureResult               | What was the other culture result? Positive or negative.                                                                                                   |
| SpecifyOtherCulture              | Free text (specify other culture type).                                                                                                                    |
| OtherPositiveOrganism            | Free text (organism on other culture, including species and colony-forming units).                                                                         |
| CVLOnCXR                         | Was a central line seen on radiograph? Yes or no.                                                                                                          |
| RapidRSV                         | Was a rapid respiratory syncytial virus test completed? Yes or no.                                                                                         |
| RapidRSVResult                   | What was the rapid respiratory syncytial virus result? Yes or no.                                                                                          |
| Attending                        | Free text (attending physician).                                                                                                                           |
| Fellow                           | Free text (fellow physician).                                                                                                                              |
| TriageNurse                      | Free text (triage nurse).                                                                                                                                  |
| Bolus1Volume                     | What was the volume (in mL) of the first bolus?                                                                                                            |
| Bolus2Given                      | Was a second bolus given in the ED? Yes or no.                                                                                                             |
| Bolus2Volume                     | What was the volume (in mL) of the second bolus?                                                                                                           |
| Bolus2Time                       | Timestamp of second bolus initiation.                                                                                                                      |

**SUPPLEMENTAL TABLE 4** Continued

| Variable                   | Definition                                                                                                                                                                                  |
|----------------------------|---------------------------------------------------------------------------------------------------------------------------------------------------------------------------------------------|
| Bolus3Volume               | What was the volume (in mL) of the third bolus?                                                                                                                                             |
| Bolus4Given                | Was a fourth bolus given in the ED? Yes or no.                                                                                                                                              |
| Bolus4Volume               | What was the volume (in mL) of the fourth bolus?                                                                                                                                            |
| Bolus4Time                 | Timestamp of fourth bolus initiation.                                                                                                                                                       |
| Bolus5Given                | Was a fifth bolus given in the ED? Yes or no.                                                                                                                                               |
| Bolus5Volume               | What was the volume (in mL) of the fifth bolus?                                                                                                                                             |
| Bolus5Time                 | Timestamp of fifth bolus initiation.                                                                                                                                                        |
| FirstAntibiotic            | Name of first antibiotic given in the ED (ceftriaxone, cefotaxime, ampicillin, gentamicin, vancomycin, piperacillin-tazobactam, ceftazidime, meropenem, clindamycin, or other).             |
| SecondAntibiotic           | Name of second antibiotic given in the ED (if given) (ceftriaxone, cefotaxime, ampicillin, gentamicin, vancomycin, piperacillin-tazobactam, ceftazidime, meropenem, clindamycin, or other). |
| SecondAntibioticTime       | Timestamp of second antibiotic initiation                                                                                                                                                   |
| ThirdAntibiotic            | Name of third antibiotic given in the ED (if given) ceftriaxone/cefotaxime/ampicillin/gentamicin/vancomycin/piperacillin-tazobactam/Ceftazafidime/Meropenem/Clindamycin/Other               |
| ThirdAntibioticTime        | Timestamp of third antibiotic initiation                                                                                                                                                    |
| PressorsGiven              | Were vasoactive agents initiated in the ED? Yes or no                                                                                                                                       |
| Dopamine                   | Was dopamine initiated in the ED? Yes or no                                                                                                                                                 |
| DopamineTime               | Timestamp of dopamine initiation                                                                                                                                                            |
| DopamineMaxDose            | What was the maximum dose of dopamine?                                                                                                                                                      |
| Dobutamine                 | Was dobutamine initiated in the ED? Yes or no                                                                                                                                               |
| DobutamineTime             | Timestamp of dobutamine initiation                                                                                                                                                          |
| DobutamineMaxDose          | What was the maximum dose of dobutamine?                                                                                                                                                    |
| Epinephrine                | Was epinephrine initiated in the ED? Yes or no                                                                                                                                              |
| EpinephrineTime            | Timestamp of epinephrine initiation                                                                                                                                                         |
| EpinephrineMaxDose         | What was the maximum dose of epinephrine?                                                                                                                                                   |
| Norepi                     | Was norepinephrine initiated in the ED? Yes or no.                                                                                                                                          |
| NorepiTime                 | Timestamp of norepinephrine initiation.                                                                                                                                                     |
| NorepiMaxDose              | What was the maximum dose of norepinephrine?                                                                                                                                                |
| Milirone                   | Was milrinone initiated in the ED? Yes or no.                                                                                                                                               |
| MilironeTime               | Timestamp of milrinone initiation.                                                                                                                                                          |
| MilironeMaxDose            | What was the maximum dose of milrinone?                                                                                                                                                     |
| FirstPressorStartTime      | Timestamp of earliest initiated vasoactive agent in the ED.                                                                                                                                 |
| SteroidsGiven              | Were steroids given in the ED? Yes, no, or indeterminate.                                                                                                                                   |
| Intubated                  | Was the patient intubated in the ED? Yes or no.                                                                                                                                             |
| BiPAPOrCPAPUtilized        | Was BiPAP or CPAP used in the ED? Yes or no.                                                                                                                                                |
| IntubationDrug             | What intubation drug was used? Ketamine, etomidate, fentanyl, versed, propofol, other, or none.                                                                                             |
| PathwayInitiation          | If a sepsis pathway was initiated (based on local definition), when? Triage, ED, course, other, or blank for none).                                                                         |
| TriageTemp                 | First temperature measurement.                                                                                                                                                              |
| PatientRoom                | Where was the patient initially cared for? Resuscitation room or other.                                                                                                                     |
| TriageHeartRate            | First heart rate measurement.                                                                                                                                                               |
| TriageRespiratoryRate      | First respiratory rate measurement.                                                                                                                                                         |
| TriageSystolicBP           | First systolic blood pressure measurement.                                                                                                                                                  |
| TriageDiastolicBP          | First diastolic blood pressure measurement.                                                                                                                                                 |
| TriageMentalStatus         | Initial documented mental status. Normal or abnormal.                                                                                                                                       |
| TriagePulses               | Initial documented pulse quality. Normal, bounding, weak-thready peripherally but normal centrally, weak-thready centrally, or absent.                                                      |
| TriageCapillaryRefill      | Initial documented capillary refill measurement. $\leq 2$ s, 3–5 s, or $\geq 6$ s.                                                                                                          |
| TriageSkinChanges          | Initial documented skin assessment measurement. Cool or pale, gray-ashen-dusky, clammy-diaphoretic, flushed-ruddy-erythroderma, petechiae-purpura, or mottled.                              |
| PulseOx                    | Initial pulse oximeter measurement.                                                                                                                                                         |
| OnOxygen                   | Was the patient receiving supplemental oxygen during the pulse oximeter measurement? Yes or no.                                                                                             |
| MinutesCriteriaComplete    | Minutes between ED arrival and completion of all 5 vital signs.                                                                                                                             |
| PatientNotPlaced           | Was the patient on a sepsis pathway (local definition)? Yes or no.                                                                                                                          |
| RNBPAAccept                | Did the nurse accept a sepsis Best Practice Alert? Yes, no, or indeterminate.                                                                                                               |
| MDBPAAccept                | Did the physician accept a sepsis Best Practice Alert? Yes, no, or indeterminate.                                                                                                           |
| OrderSetUsed               | Was a sepsis-specific order used? Yes or no.                                                                                                                                                |
| OrderSetUtilizationTime    | Timestamp of sepsis-specific order set initiation.                                                                                                                                          |
| PatientEscalateAfterTriage | Did the first signs of sepsis develop later than triage? Yes or no.                                                                                                                         |
| PatientEscalateTime        | Timestamp of first signs of sepsis (if after triage)                                                                                                                                        |

**SUPPLEMENTAL TABLE 4** Continued

| Variable                      | Definition                                                                                                                                                 |
|-------------------------------|------------------------------------------------------------------------------------------------------------------------------------------------------------|
| HowPatientEscalatedIdentified | How were the first signs of sepsis recognized if the patient developed them later than triage? Order set, heart rate, later trigger, hypotension, or other |
| PresentedAbdominalPain        | Did the patient present with abdominal pain? Yes or no.                                                                                                    |
| CVL                           | Did the patient have a central venous catheter? Yes or no.                                                                                                 |
| ChronicIllness                | Did the patient have a chronic illness? Yes or no.                                                                                                         |
| MedicalConditionType          | What type of chronic condition did the patient have? (systems-based list and free text accepted).                                                          |

BiPAP, bilevel positive airway pressure; CPAP, continuous positive airway pressure.
